# Supplementary material for: Republished: Interhospital teleproctoring of endovascular intracranial aneurysm treatment using a dedicated live-streaming technology: first experiences during the COVID-19 pandemic
Source: PubMed Central journal article supplement — J Neurointerv Surg. 2020 Oct 20;13(2):e1. doi: 10.1136/neurintsurg-2020-016722.rep (PMC7848056; doi:10.1136/neurintsurg-2020-016722.rep), 2020-10-20

### Online supplement

**Video:** Demonstration of the user interface and image quality of the Tegos system (reduced image quality for practicability purposes). Exemplary transmission of an angiography screen with pre-recorded roadmap loops, displaying an aneurysm with a WEB device and the probing of an aneurysm with a guide wire (Excelsior SL10, Stryker, Kalamazoo, MI; Traxcess 14, MicroVention, Aliso Viejo, CA). In the final section of the video, the preparation of a WEB device is shown (SLS6, 6 x 4.6 mm, MicroVention, Aliso Viejo, CA). The footage does not originate from the cases presented in this report.

**Figure:** Screenshots related to the attached video (see description above). Upper left: Probing of an aneurysm with a guide wire. Upper right: Aneurysm with a WEB device. Bottom: Preparation of a WEB device. The footage does not originate from the cases presented in this report.

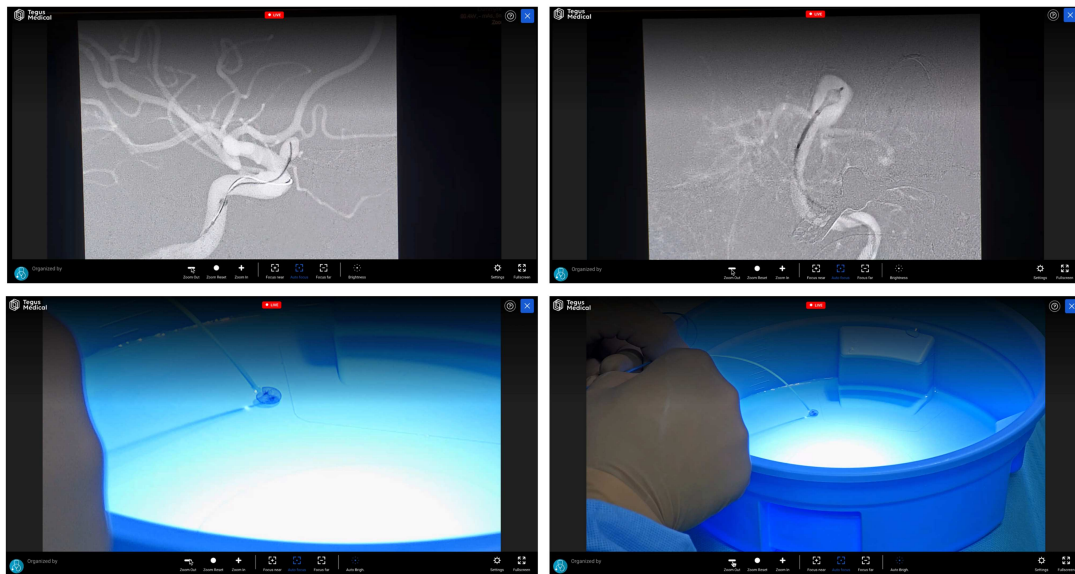

Supplement: neurintsurg-2020-016722.repsupp001.pdf [file neurintsurg-2020-016722.repsupp001.pdf]
